# Supplementary material for: Intracellular, time-resolved speciation and quantification of arsenic compounds in human urothelial and hepatoma cells
Source: Royal Society of Chemistry journal article supplement (doi:10.1039/c1ja10150a), 2011-01-01
Supplement: c1ja10150a.pdf [file c1ja10150a.pdf]

## Comparison of remaining MMA(III) after washing procedure

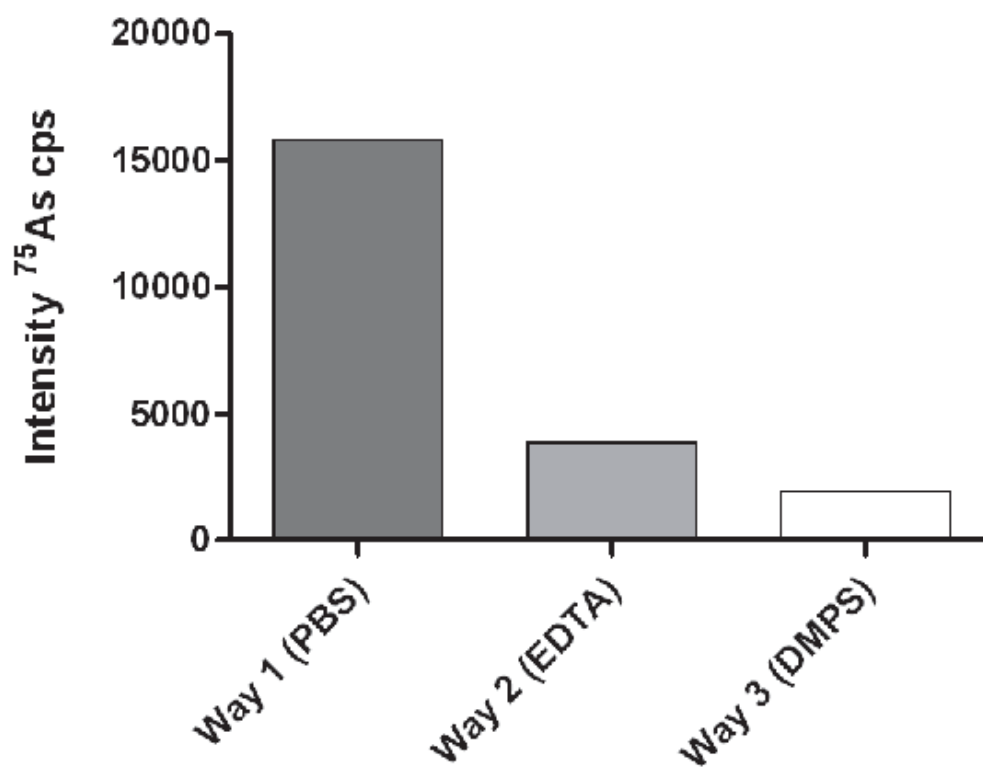

**last washing solution immediately before lysis**
